# Supplementary material for: Antimetabolite Drugs Exhibit Distinctive Immunomodulatory Mechanisms and Effects on the Intestinal Microbiota in Experimental Autoimmune Uveitis
Source: PubMed Central journal article supplement — Invest Ophthalmol Vis Sci. 2022 Mar 31;63(3):30. doi: 10.1167/iovs.63.3.30 (PMC8976920; doi:10.1167/iovs.63.3.30), 2022-03-31
Supplement: iovs-63-3-30_s001.pdf [file iovs-63-3-30_s001.pdf]

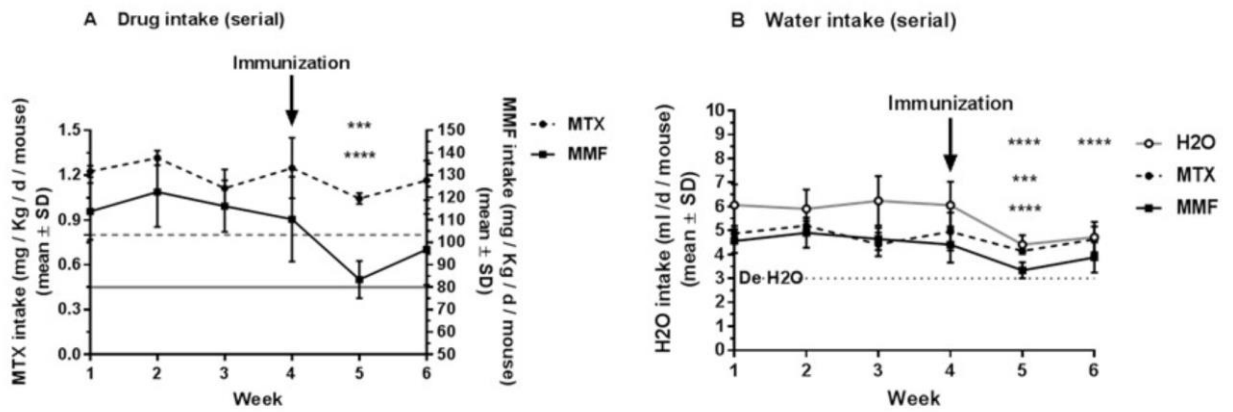

**Figure S1.** Antimetabolite drugs intake (A) and water intake (B) during the study period. MTX, methotrexate; MMF, mycophenolate mofetil; DeH2O, dehydration threshold. Statistical significance compared to baseline (first week). \*\*\* $p < 0.001$ , \*\*\*\* $p < 0.0001$ . Cohorts of 6 to 10 mice per treatment repeated twice.
