# Supplementary material for: Antimetabolite Drugs Exhibit Distinctive Immunomodulatory Mechanisms and Effects on the Intestinal Microbiota in Experimental Autoimmune Uveitis
Source: PubMed Central journal article supplement — Invest Ophthalmol Vis Sci. 2022 Mar 31;63(3):30. doi: 10.1167/iovs.63.3.30 (PMC8976920; doi:10.1167/iovs.63.3.30), 2022-03-31
Supplement: iovs-63-3-30_s002.pdf [file iovs-63-3-30_s002.pdf]

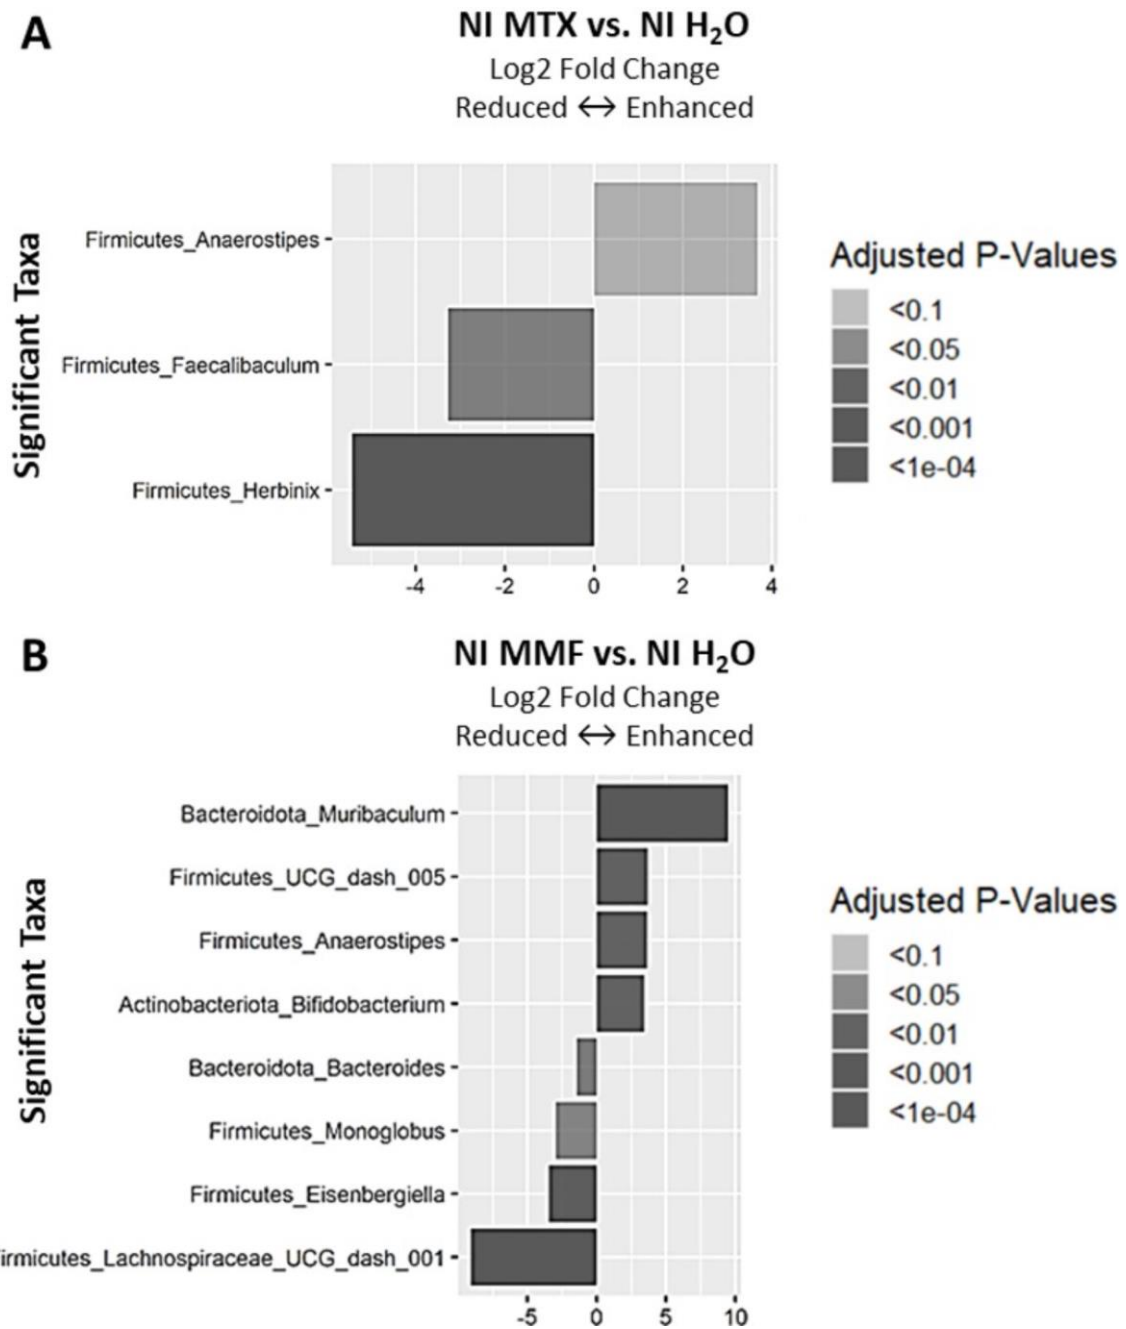

**Figure S2.** Differential abundances of intestinal bacterial genera in non-immunized (NI) mice treated with methotrexate (MTX) (A) or mycophenolate mofetil (MMF) (B) as compared to water-fed controls (H<sub>2</sub>O). Time-point = 6 weeks post-treatment initiation.
