# Supplementary material for: Antimetabolite Drugs Exhibit Distinctive Immunomodulatory Mechanisms and Effects on the Intestinal Microbiota in Experimental Autoimmune Uveitis
Source: PubMed Central journal article supplement — Invest Ophthalmol Vis Sci. 2022 Mar 31;63(3):30. doi: 10.1167/iovs.63.3.30 (PMC8976920; doi:10.1167/iovs.63.3.30), 2022-03-31
Supplement: iovs-63-3-30_s003.pdf [file iovs-63-3-30_s003.pdf]

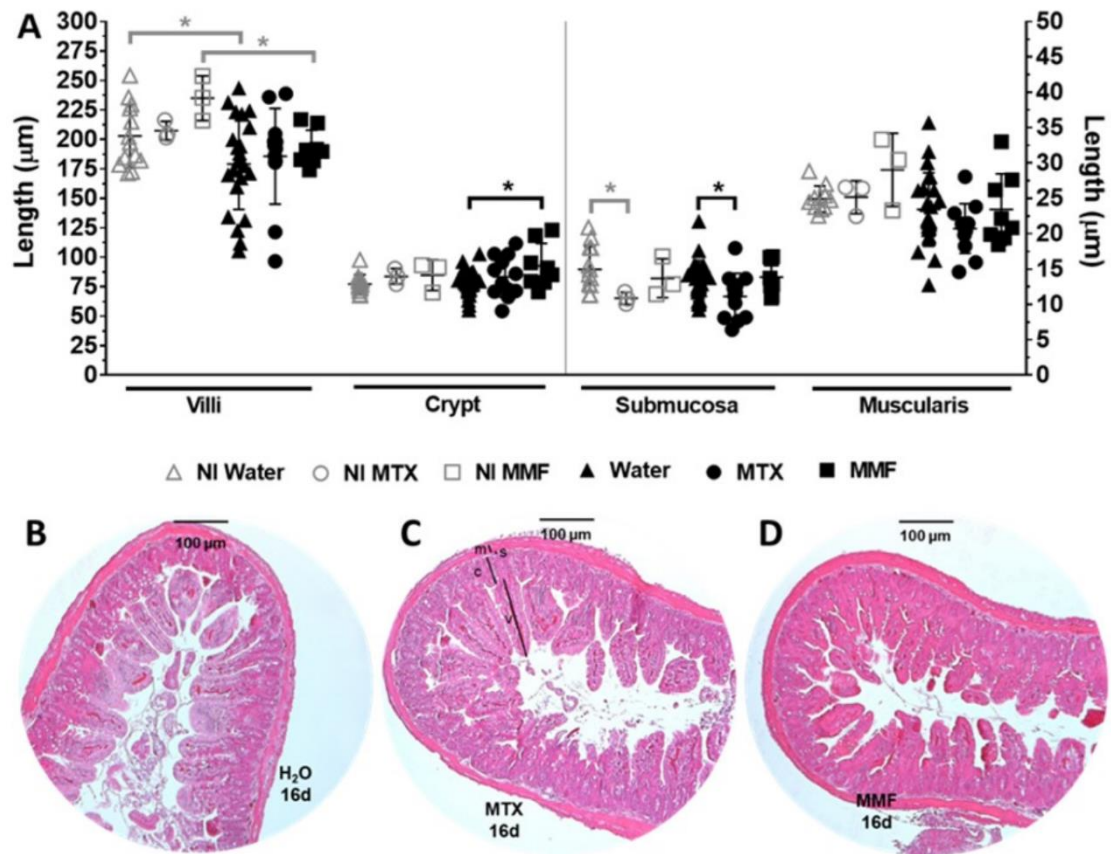

**Figure S3.** Differences in length or thickness of different ileum histological structures in non-immunized (NI) and immunized (Experimental Autoimmune Uveitis) mice receiving water or treated with methotrexate (MTX) or mycophenolate mofetil (MMF). (A) Histopathological differences among groups; Representative examples of immunized mice receiving water (B), MTX-treated mice (C), and MMF-treated mice (D). Hematoxylin & eosin, 10x. m, muscularis; s, submucosa; c, crypt; v, villi. \* $p < 0.05$ .  $n = 3-9$  mice per group (non-immunized), and 8-24 mice per group (immunized). Time-point = 6 weeks post-treatment initiation, 2 weeks post-immunization.
