# Supplementary material for: Antimetabolite Drugs Exhibit Distinctive Immunomodulatory Mechanisms and Effects on the Intestinal Microbiota in Experimental Autoimmune Uveitis
Source: PubMed Central journal article supplement — Invest Ophthalmol Vis Sci. 2022 Mar 31;63(3):30. doi: 10.1167/iovs.63.3.30 (PMC8976920; doi:10.1167/iovs.63.3.30), 2022-03-31
Supplement: iovs-63-3-30_s004.pdf [file iovs-63-3-30_s004.pdf]

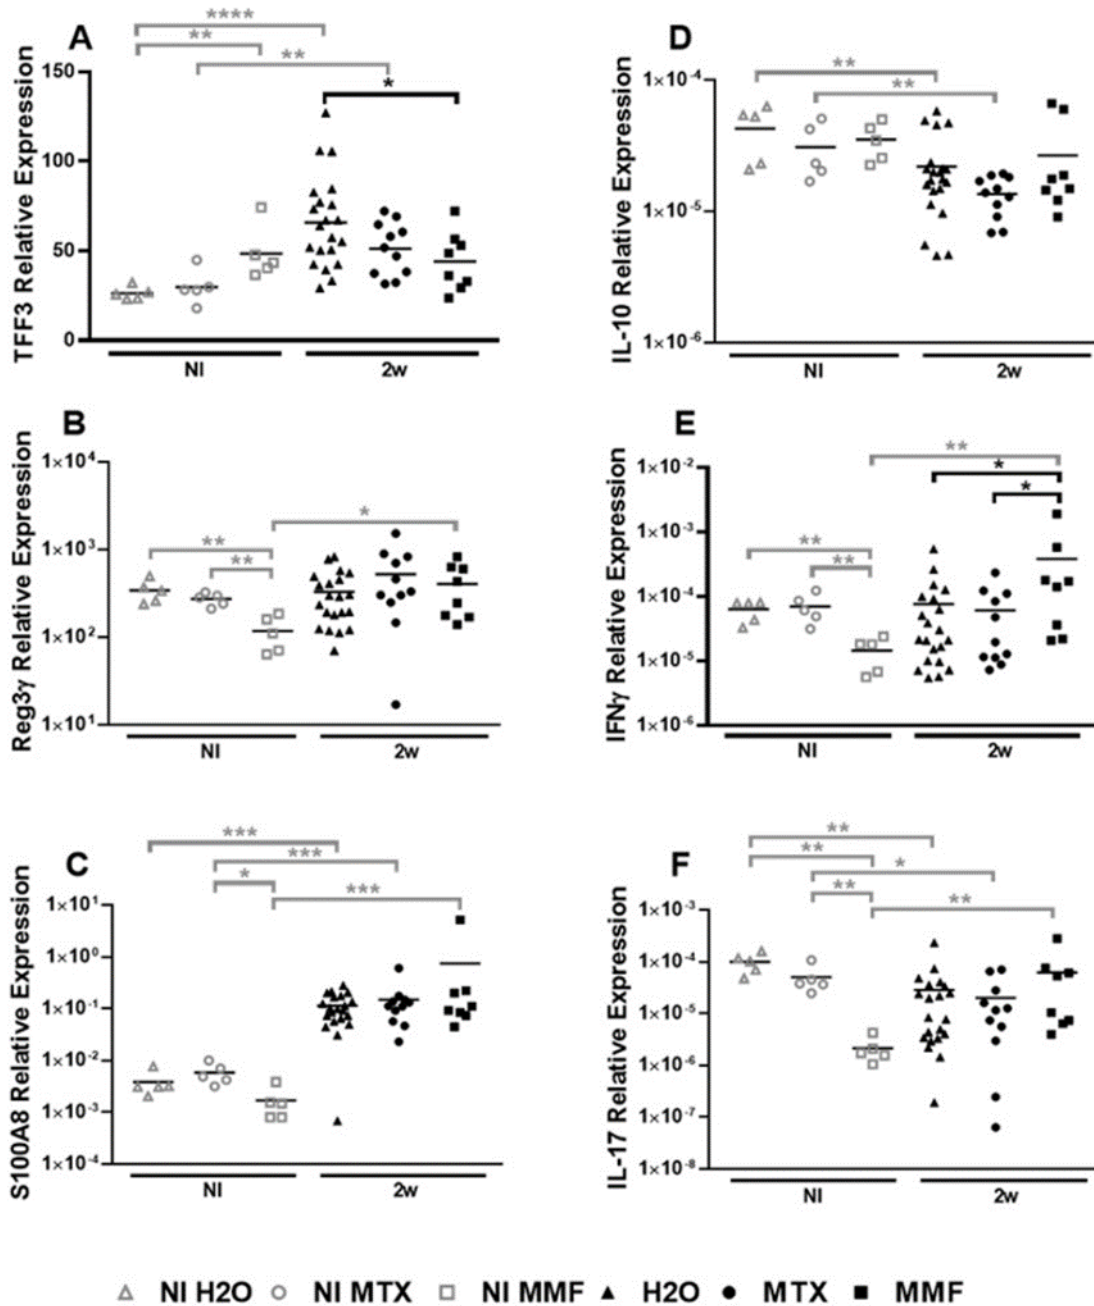

**Figure S4.** Differences in relative gene expression in the ileum of non-immunized (NI) and immunized (Experimental Autoimmune Uveitis) mice. Antimicrobial peptides: trefoil factor 3 (TFF3) (A), regenerating islet-derived protein 3 gamma (Reg3) (B), calgranulin A (S100A8) (C), and cytokines: IL-10 (D), IFN gamma (E), and IL-17 (F). H2O, water-fed controls; MTX, methotrexate treated mice; MMF, mycophenolate mofetil treated mice. n = 5 mice per group (non-immunized), and 8-24 mice per group (immunized). Time-point = 6 weeks post-treatment initiation, 2 weeks post-immunization.
