# Supplementary material for: Antimetabolite Drugs Exhibit Distinctive Immunomodulatory Mechanisms and Effects on the Intestinal Microbiota in Experimental Autoimmune Uveitis
Source: PubMed Central journal article supplement — Invest Ophthalmol Vis Sci. 2022 Mar 31;63(3):30. doi: 10.1167/iovs.63.3.30 (PMC8976920; doi:10.1167/iovs.63.3.30), 2022-03-31
Supplement: iovs-63-3-30_s005.pdf [file iovs-63-3-30_s005.pdf]

**Table S1.** Cytokine release concentrations from stimulated lymphocytes in different tissues in Experimental Autoimmune Uveitis.

|     |                                     | TNF- $\alpha$   | IL-17A            | IL-6            | IL-1 $\beta$    | IL-2            | IL-12p70        | IFN- $\gamma$   |
|-----|-------------------------------------|-----------------|-------------------|-----------------|-----------------|-----------------|-----------------|-----------------|
| EYE | H <sub>2</sub> O                    | 1.00 $\pm$ 0.58 | 1.00 $\pm$ 0.85   | 1.00 $\pm$ 0.51 | 1.00 $\pm$ 0.71 | 1.00 $\pm$ 1.27 | 1.00 $\pm$ 0.68 | 1.00 $\pm$ 0.84 |
|     | MTX                                 | 0.08 $\pm$ 0.07 | 0.04 $\pm$ 0.08   | 0.59 $\pm$ 0.23 | 0.03 $\pm$ 0.03 | 0.03 $\pm$ 0.01 | 2.01 $\pm$ 3.03 | 0.45 $\pm$ 0.28 |
|     | MTX vs. H <sub>2</sub> O<br>p-value | ↓ 0.001         | ↓ 0.001           | ns              | ↓ 0.002         | ns              | ns              | ns              |
|     | MMF                                 | 1.34 $\pm$ 0.77 | 0.54 $\pm$ 0.65   | 1.53 $\pm$ 0.81 | 0.99 $\pm$ 0.59 | 2.16 $\pm$ 1.33 | 3.58 $\pm$ 3.20 | 1.67 $\pm$ 0.45 |
|     | MMF vs. H <sub>2</sub> O<br>p-value | ns              | ns                | ns              | ns              | ns              | ns              | ns              |
| CLN | H <sub>2</sub> O                    | 1.02 $\pm$ 0.54 | 1.04 $\pm$ 0.94   | 1.03 $\pm$ 0.77 | 1.05 $\pm$ 0.93 | 1.02 $\pm$ 0.80 | 1.00 $\pm$ 0.66 | 0.99 $\pm$ 1.22 |
|     | MTX                                 | 0.80 $\pm$ 0.74 | 0.67 $\pm$ 0.65   | 0.79 $\pm$ 0.78 | 0.25 $\pm$ 0.27 | 0.29 $\pm$ 0.29 | 0.25 $\pm$ 0.30 | 1.31 $\pm$ 2.41 |
|     | MTX vs. H <sub>2</sub> O<br>p-value | ns              | ns                | ns              | ↓ 0.004         | ↓ 0.002         | ↓ <0.001        | ns              |
|     | MMF                                 | 1.02 $\pm$ 0.70 | 0.24 $\pm$ 0.22   | 0.53 $\pm$ 0.47 | 1.00 $\pm$ 0.75 | 1.26 $\pm$ 0.66 | 2.53 $\pm$ 3.62 | 2.66 $\pm$ 2.73 |
|     | MMF vs. H <sub>2</sub> O<br>p-value | ns              | ↓ 0.035           | ns              | ns              | ns              | ns              | ns              |
| SPN | H <sub>2</sub> O                    | 1.0 $\pm$ 0.17  | 1.0 $\pm$ 0.44    | 1.0 $\pm$ 0.39  | 1.0 $\pm$ 0.34  | 1.0 $\pm$ 0.36  | 1.0 $\pm$ 0.75  | 1.0 $\pm$ 0.53  |
|     | MTX                                 | 1.24 $\pm$ 0.35 | 2.77 $\pm$ 2.25   | 2.04 $\pm$ 0.84 | 1.17 $\pm$ 0.75 | 0.55 $\pm$ 0.27 | 0.57 $\pm$ 0.55 | 0.51 $\pm$ 0.51 |
|     | MTX vs. H <sub>2</sub> O<br>p-value | ↑ 0.013         | ↑ 0.001           | ↑ <0.001        | ns              | ↓ <0.001        | ns              | ↓ <0.001        |
|     | MMF                                 | 0.96 $\pm$ 0.34 | 0.68 $\pm$ 0.65   | 2.15 $\pm$ 1.60 | 0.97 $\pm$ 0.66 | 0.92 $\pm$ 0.31 | 1.17 $\pm$ 0.96 | 1.60 $\pm$ 1.04 |
|     | MMF vs. H <sub>2</sub> O<br>p-value | ns              | ns                | ns              | ns              | ns              | ns              | ns              |
| MLN | H <sub>2</sub> O                    | 1.02 $\pm$ 0.69 | 1.01 $\pm$ 0.96   | 1.04 $\pm$ 0.75 | 1.10 $\pm$ 1.48 | 1.03 $\pm$ 0.72 | 1.03 $\pm$ 0.94 | 1.14 $\pm$ 1.43 |
|     | MTX                                 | 2.47 $\pm$ 1.59 | 11.48 $\pm$ 17.68 | 4.56 $\pm$ 5.68 | 1.48 $\pm$ 2.09 | 2.76 $\pm$ 2.34 | 1.72 $\pm$ 3.31 | 1.78 $\pm$ 2.26 |
|     | MTX vs. H <sub>2</sub> O<br>p-value | ↑ 0.012         | ↑ 0.001           | ↑ 0.021         | ns              | ↑ 0.037         | ns              | ns              |
|     | MMF                                 | 0.79 $\pm$ 0.61 | 5.10 $\pm$ 8.16   | 1.88 $\pm$ 1.79 | 3.05 $\pm$ 6.00 | 0.74 $\pm$ 0.59 | 0.46 $\pm$ 0.25 | 3.15 $\pm$ 3.23 |
|     | MMF vs. H <sub>2</sub> O<br>p-value | ns              | ns                | ns              | ns              | ns              | ns              | ns              |
| LPL | H <sub>2</sub> O                    | 1.00 $\pm$ 0.70 | 1.00 $\pm$ 0.74   | 1.00 $\pm$ 0.52 | 1.00 $\pm$ 0.58 | 1.00 $\pm$ 0.56 | 1.00 $\pm$ 0.51 | 1.00 $\pm$ 0.67 |
|     | MTX                                 | 0.50 $\pm$ 0.27 | 0.90 $\pm$ 0.51   | 0.85 $\pm$ 0.57 | 0.51 $\pm$ 0.29 | 0.30 $\pm$ 0.38 | 1.52 $\pm$ 1.22 | 1.53 $\pm$ 2.37 |
|     | MTX vs. H <sub>2</sub> O<br>p-value | ↓ 0.010         | ns                | ns              | ↓ 0.007         | ↓ <0.001        | ns              | ns              |
|     | MMF                                 | 2.95 $\pm$ 3.76 | 2.16 $\pm$ 2.01   | 1.76 $\pm$ 1.41 | 2.75 $\pm$ 4.38 | 1.30 $\pm$ 0.91 | 1.46 $\pm$ 1.10 | 4.32 $\pm$ 8.12 |
|     | MMF vs. H <sub>2</sub> O<br>p-value | ns              | ns                | ns              | ns              | ns              | ns              | ns              |

Increased folds compared to water. Arrows mean increased (up) or decreased (down). CLN, cervical lymph node; SPN, spleen; MLN, mesenteric lymph node; LPL, gut lamina propria. H<sub>2</sub>O, water-fed control group; MTX, methotrexate treated mice; MMF, mycophenolate mofetil treated mice; ns, non-significant change. n=8-22 mice per group. Time-point = 6 weeks post-treatment initiation, 2 weeks post-immunization.
